# Supplementary material for: Associated Factors of High Sedative Requirements within Patients with Moderate to Severe COVID-19 ARDS
Source: MDPI journal article supplement (doi:10.3390/jcm11030588), 2022-01-25
Supplement: s1 [file s1]

# Supplement I

## Sedation protocol

| <b>Expected short-term sedation:</b>  |                                      |
|---------------------------------------|--------------------------------------|
| Propofol                              | (continuously supplied as mg/kg/h)   |
| ↳ if insufficient sedation level:     |                                      |
| - combination with dexmedetomidin     | (continuously supplied as µg/kg/h)   |
| ↳ if insufficient sedation level:     |                                      |
| - combination with lorazepam          | (continuously supplied as µg/kg/min) |
| Supplementary analgesia: Remifentanyl | (continuously supplied as µg/kg/min) |
| <b>Expected long-term sedation:</b>   |                                      |
| ≤ day 6* Propofol                     | (continuously supplied as mg/kg/min) |
| > day 7 switch to midazolam           | (continuously supplied as mg/kg/h)   |
| ↳ if insufficient sedation level:     |                                      |
| - combination with clonidine          | (continuously supplied as µg/kg/h)   |
| ↳ if insufficient sedation level:     |                                      |
| - combination with Esketamine         | (continuously supplied as mg/kg/h)   |
| Supplementary analgesia: Sufentanyl   | (continuously supplied as µg/kg/h)   |

\* In line with recommendations to avoid propofol infusion syndrome [4,59].

## Reference

- Taskforce, D.A.S.; Baron, R.; Binder, A.; Biniek, R.; Braune, S.; Buerkle, H.; Dall, P.; Demirkaya, S.; Eckardt, R.; Eggers, V.; et al. Evidence and consensus based guideline for the management of delirium, analgesia, and sedation in intensive care medicine. Revision 2015 (DAS-Guideline 2015)-short version. *Ger. Med. Sci.* **2015**, *13*, Doc19. <https://doi.org/10.3205/000223>.
- Hemphill, S.; McMenamin, L.; Bellamy, M.C.; Hopkins, P.M. Propofol infusion syndrome: a structured literature review and analysis of published case reports. *Br. J. Anaesth.* **2019**, *122*, 448–459, <https://doi.org/10.1016/j.bja.2018.12.025>.
